# Supplementary material for: Anonymous gateway-oriented password-based authenticated key exchange based on RSA
Source: Springer Nature journal article supplement (doi:10.1186/1687-1499-2011-162), 2011-11-10
Supplement: 13638_2011_157_MOESM1_ESM.pdf [file 13638_2011_157_MOESM1_ESM.pdf]

$pw \in \mathcal{D}$  $pw \in \mathcal{D}$ RSA keys :  $n, e, d$ RSA keys :  $n', e', d'$ unauthenticated  
channelauthenticated  
private channelaccept  $\leftarrow$  falseaccept  $\leftarrow$  false $r_1 \in_R \{0, 1\}^k$  $\xrightarrow{C, n, e, r_1}$  $\xrightarrow{C, n, e, n', e', r_1}$  $e$  80-bit prime? and  $n$  odd?

if not, reject. otherwise,

 $x_1, x_2 \in_R Z_n^*, r_2 \in_R \{0, 1\}^k$  $y_1 = x_1^e \bmod n, y_2 = x_2^e \bmod n$  $w = H(pw, x_2, ID_1)$  $ID_1 = (C, G, n, e, n', e', r_1, r_2, y_2)$ if  $\gcd(w, n) \neq 1$ , reject $z = y_1 \cdot w \bmod n$  $\xleftarrow{G, n', e', r_2, z, y_2}$  $\xleftarrow{r_2, z, y_2}$  $n'$  odd? $b_1 \in_R Z_{n'}^*, x_2 = y_2^d \bmod n$  $w = H(pw, x_2, ID_1)$ if  $\gcd(w, n) \neq 1$ , reject $c_1 = b_1^{e'} \bmod n'$  $x_1 = (w^{-1} \cdot z)^d \bmod n$  $\mu = H_1(x_1, ID_1, z, c_1)$  $\xrightarrow{C, c_1, \mu} b_2 \in_R Z_n^*$  $c_2 = b_2^e \bmod n$  $\xrightarrow{C, c_1, c_2, \mu} \mu$  valid? $\eta = H_2(x_1, ID_1, ID_2)$  $ID_2 = (z, c_1, c_2)$  $\xleftarrow{\eta}$  $b_1 = c_1^{d'} \bmod n'$  $\xleftarrow{G, \eta, c_2}$  $\eta$  valid? $b_2 = c_2^d \bmod n$  $sk \leftarrow H_3(b_1, b_2, ID)$  $ID = (ID_1, ID_2)$  $sk \leftarrow H_3(b_1, b_2, ID)$ accept  $\leftarrow$  trueaccept  $\leftarrow$  true
